# Supplementary material for: Linking Demographic Processes of Juvenile Corals to Benthic Recovery Trajectories in Two Common Reef Habitats
Source: PubMed Central journal article supplement (PMC4444195; doi:10.1371/journal.pone.0128535), 2015-05-26
Supplement: pone.0128535.s004.pdf [file pone.0128535.s004.pdf]

**Table S2. ANOSIM of the (a) global and (b) pair wise tests comparing the benthic community cover of the broad community in the reef flat and reef slope (n = 10), and the permanent plots in the reef flat (n = 46) and reef slope (n = 36), at the beginning of the study period (August 2009).**

|                    | R statistic | Significance % | Perms | Perms $\geq$ global R |
|--------------------|-------------|----------------|-------|-----------------------|
| a. Global test     | 0.538       | 0.1            | 999   | 0                     |
| b. Pair wise tests |             |                |       |                       |
| RF plot, RS plot   | 0.638       | 0.1            | 999   | 0                     |
| RF plot, RF broad  | 0.131       | 5.8            | 999   | 57                    |
| RF plot, RS broad  | 0.430       | 0.1            | 999   | 0                     |
| RS plot, RF broad  | 0.992       | 0.1            | 999   | 0                     |
| RS plot, RS broad  | 0.087       | 13.2           | 999   | 131                   |
| RF broad, RS broad | 1.000       | 0.1            | 999   | 0                     |
